# Supplementary material
Source: PubMed Central journal article supplement (PMC3213399)
Supplement: mmc1.pdf [file mmc1.pdf]

**The American Journal of Human Genetics, Volume 89  
Supplemental Data**

**Whole-Exome-Sequencing Identifies Mutations  
in Histone Acetyltransferase Gene *KAT6B* in Individuals  
with the Say-Barber-Biesecker Variant of Ohdo Syndrome**

**Jill Clayton-Smith, James O'Sullivan, Sarah Daly, Sanjeev Bhaskar, Ruth Day, Beverley Anderson, Anne K. Voss, Tim Thomas, Leslie G. Biesecker, Philip Smith, Alan Fryer, Kate E. Chandler, Bronwyn Kerr, May Tassabehji, Sally-Ann Lynch, Malgorzata Krajewska-Walasek, Shane McKee, Janine Smith, Elizabeth Sweeney, Sahar Mansour, Shehla Mohammed, Dian Donnai, and Graeme Black**

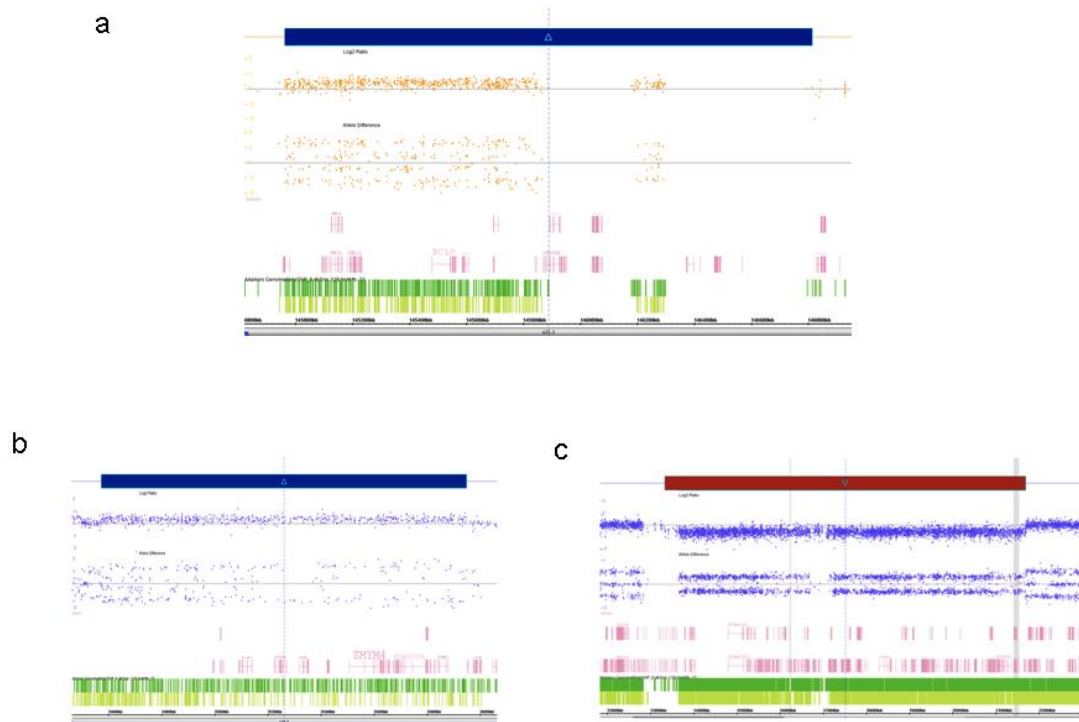

### Figure S1. Microarray Results of Individuals 3 and 17

(A) Individual 3 was shown to have a duplication of ~2Mb within the long arm of chromosome 1 at band q21.1, flanked by markers CN\_436418 and CN\_004940 (nucleotides chr1:144643813-146814404 based on Ensembl Build 36) This duplication was subsequently confirmed using BAC probe RP11-533N14 , with parental FISH studies showing a normal hybridisation pattern.

(B) Deletion of ~8.3Mb from band p36.12 to p36.21, flanked by markers CN\_450710 and CN\_483670 (nucleotides chr1: 13339380-21692325 based on Ensembl Build 36) identified in Individual 17

(C) Duplication of ~1.3Mb within band 1p34 in Individual 17, flanked by markers CN\_488937 and CN\_022530 (nucleotides chr1: 34572912-35949096)

Both changes were confirmed by fluorescent in-situ hybridisation (FISH) using the BAC probes RP11-174G17 and RP11-244H3 respectively.

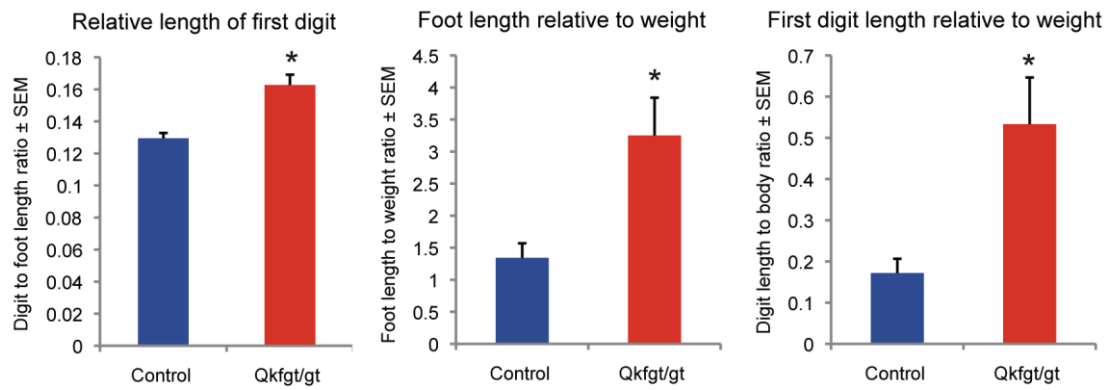

**Figure S2. Demonstration of Disproportionately Long First Digits of Hind Limbs of  $Qkf^{gt/gt}$  Mouse Compared to Wild-Type**

Images were taken of hindfeet of mice and measurements were taken from these images. Data were presented as means  $\pm$  SEM of biological replicates, i.e. measurements taken from individual mice ( $n = 3-4$   $Qkf^{gt/gt}$  and 3-4 controls), and analysed by two-sided T-test using Stata Intercooled 10.0 software

**Table S1. Clinical Features of All Individuals Tested**

| Individual          | 1  | 2   | 3   | 4   | 5  | 6   | 7   | 8   | 9   |
|---------------------|----|-----|-----|-----|----|-----|-----|-----|-----|
| Sex                 | M  | F   | F   | M   | M  | F   | M   | F   | F   |
| Typical face        | +  | +   | +/- | +   | +  | +   | +   | +   | +   |
| Birth weight %      | 50 | 75  | 24  | 0.4 | 50 | 50  | n/k | 9   | 50  |
| Hypotonia           | +  | +   | +   | +   | +  | +   | +   | +   | +   |
| Learning Disability | +  | +   | +   | +   | +  | +   | +   | +   | +   |
| Feeding problems    | +  | +   | +   | +   | +  | +   | +   | +   | +   |
| Dental anomalies    | +  | +   | +   | n/k | +  | +   | +   | +   | +   |
| Long thumbs         | +  | +   | -   | +   | +  | +   | -   | +   | +   |
| Long great toes     | +  | +   | -   | +   | +  | +   | -   | +   | +   |
| Hearing problem     | -  | +   | +   | +   | +  | -   | +   | +   | +   |
| Abnormal patella    | -  | +   | -   | +   | +  | -   | -   | +   | -   |
| Lacrimal duct abn.  | -  | +   | +   | +   | +  | +   | +   | +   | +   |
| Cleft palate        | -  | -   | -   | +   | -  | -   | +   | +   | +   |
| Thyroid abnormal    | -  | -   | +   | +   | -  | +   | +   | +   | -   |
| Heart Defect        | -  | -   | -   | +   | +  | +   | +   | +   | +   |
| Cryptorchidism      | +  | n/a | n/a | +   | +  | n/a | +   | n/a | n/a |
| Hypospadias         | +  | n/a | n/a | +   | -  | n/a | +   | n/a | n/a |
| Height %            | 50 | n/k | 25  | 25  | 50 | 9   | n/k | n/k | 2   |
| Weight %            | 25 | n/k | 50  | 25  | 50 | 75  | n/k | n/k | 9   |
| OFC%                | <3 | n/k | 9   | 2   | 2  | 91  | n/k | n/k | 2-9 |

% = percentile

n/a = not applicable

n/k = not known

OFC= occipito-frontal circumference

| <b>Individual</b>           | <b>10</b>    | <b>11</b>    | <b>12</b>     | <b>13</b>  | <b>14</b>  | <b>15</b>  | <b>16</b>      | <b>17</b>      | <b>18</b>  | <b>19</b>     |
|-----------------------------|--------------|--------------|---------------|------------|------------|------------|----------------|----------------|------------|---------------|
| <b>Sex</b>                  | <b>F</b>     | <b>M</b>     | <b>F</b>      | <b>F</b>   | <b>M</b>   | <b>M</b>   | <b>M</b>       | <b>F</b>       | <b>M</b>   | <b>M</b>      |
| <b>Typical face</b>         | <b>+</b>     | <b>+/-</b>   | <b>+</b>      | <b>+</b>   | <b>+/-</b> | <b>+/-</b> | <b>+/-</b>     | <b>+/-</b>     | <b>+/-</b> | <b>+/-</b>    |
| <b>Birth weight %</b>       | <b>9</b>     | <b>50</b>    | <b>50</b>     | <b>n/k</b> | <b>95</b>  | <b>75</b>  | <b>25</b>      | <b>&lt;10</b>  | <b>50</b>  | <b>75</b>     |
| <b>Hypotonia</b>            | <b>+</b>     | <b>+</b>     | <b>+</b>      | <b>+</b>   | <b>+</b>   | <b>-</b>   | <b>+</b>       | <b>-</b>       | <b>-</b>   | <b>+</b>      |
| <b>Learning Disability</b>  | <b>+</b>     | <b>+</b>     | <b>+</b>      | <b>+/-</b> | <b>+</b>   | <b>+</b>   | <b>+</b>       | <b>+</b>       | <b>+</b>   | <b>+</b>      |
| <b>Feeding problems</b>     | <b>+</b>     | <b>+</b>     | <b>+</b>      | <b>+</b>   | <b>+</b>   | <b>+</b>   | <b>+</b>       | <b>+</b>       | <b>-</b>   | <b>+</b>      |
| <b>Dental anomalies</b>     | <b>+</b>     | <b>-</b>     | <b>+</b>      | <b>+</b>   | <b>+</b>   | <b>+</b>   | <b>-</b>       | <b>-</b>       | <b>-</b>   | <b>+</b>      |
| <b>Long thumbs</b>          | <b>+</b>     | <b>-</b>     | <b>+</b>      | <b>-</b>   | <b>-</b>   | <b>-</b>   | <b>-</b>       | <b>+</b>       | <b>-</b>   | <b>-</b>      |
| <b>Long great toes</b>      | <b>+</b>     | <b>-</b>     | <b>+</b>      | <b>-</b>   | <b>-</b>   | <b>-</b>   | <b>-</b>       | <b>-</b>       | <b>+</b>   | <b>-</b>      |
| <b>Hearing problem</b>      | <b>-</b>     | <b>-</b>     | <b>-</b>      | <b>-</b>   | <b>-</b>   | <b>+</b>   | <b>-</b>       | <b>-</b>       | <b>-</b>   | <b>+</b>      |
| <b>Patellar abnormality</b> | <b>-</b>     | <b>-</b>     | <b>-</b>      | <b>-</b>   | <b>-</b>   | <b>-</b>   | <b>-</b>       | <b>-</b>       | <b>-</b>   | <b>-</b>      |
| <b>Lacrimal duct abn.</b>   | <b>-</b>     | <b>-</b>     | <b>-</b>      | <b>-</b>   | <b>-</b>   | <b>-</b>   | <b>-</b>       | <b>-</b>       | <b>-</b>   | <b>-</b>      |
| <b>Cleft palate</b>         | <b>-</b>     | <b>-</b>     | <b>+</b>      | <b>-</b>   | <b>+</b>   | <b>-</b>   | <b>-</b>       | <b>-</b>       | <b>-</b>   | <b>-</b>      |
| <b>Thyroid abnormality</b>  | <b>-</b>     | <b>-</b>     | <b>-</b>      | <b>+</b>   | <b>-</b>   | <b>-</b>   | <b>-</b>       | <b>-</b>       | <b>-</b>   | <b>-</b>      |
| <b>Heart Defect</b>         | <b>-</b>     | <b>-</b>     | <b>-</b>      | <b>-</b>   | <b>-</b>   | <b>-</b>   | <b>-</b>       | <b>-</b>       | <b>+</b>   | <b>-</b>      |
| <b>Cryptorchidism</b>       | <b>n/a</b>   | <b>+</b>     | <b>n/a</b>    | <b>n/a</b> | <b>+</b>   | <b>+</b>   | <b>n/k</b>     | <b>n/a</b>     | <b>+</b>   | <b>-</b>      |
| <b>Hypospadias</b>          | <b>n/a</b>   | <b>-</b>     | <b>n/a</b>    | <b>n/a</b> | <b>-</b>   | <b>+</b>   | <b>-</b>       | <b>n/a</b>     | <b>-</b>   | <b>-</b>      |
| <b>Height %</b>             | <b>2-9</b>   | <b>25-50</b> | <b>50</b>     | <b>25</b>  | <b>50</b>  | <b>25</b>  | <b>25</b>      | <b>9</b>       | <b>n/k</b> | <b>&lt;25</b> |
| <b>Weight %</b>             | <b>50</b>    | <b>98</b>    | <b>75</b>     | <b>25</b>  | <b>50</b>  | <b>n/k</b> | <b>25</b>      | <b>2</b>       | <b>2-9</b> | <b>n/k</b>    |
| <b>OFC%</b>                 | <b>50-75</b> | <b>25-50</b> | <b>&lt;50</b> | <b>25</b>  | <b>91</b>  | <b>75</b>  | <b>&lt;0.4</b> | <b>&lt;0.4</b> | <b>2</b>   | <b>&lt;9</b>  |

**Table S2. Primer Sequences for *KAT6B***

| Exon    | Forward                    | Reverse                     | Product bp |
|---------|----------------------------|-----------------------------|------------|
| 3_1     | TGCTTAATACAGTCTGGAATACTCTG | TCGGCTCCTCAAGTCCTTC         | 493        |
| 3_2     | TTTCCTAAGTCAGCCAAGGG       | CCACATAAAACTTAAGTGAAACCG    | 437        |
| 4       | CTGCACTACAACCTGGCG         | CCCACTGAATTACCAATGCTG       | 595        |
| 5 and 6 | CATTGGCTAGCCTCATCAGC       | GAACCTGTATACCTCTGAGCTGTC    | 634        |
| 7       | TTGAGCAGCTTATTACAGCTACAAC  | GGAATCTGAGAGAATAACAATCACC   | 301        |
| 8_1     | GAGAAACATCTAGGTGGTGGC      | GGCACACTGCACTGGCTGG         | 668        |
| 8_2     | CCACACAAAAGCTAAAACCTCC     | ACCTATGTGACAAATAGGAATTGA    | 638        |
| 9       | TCCCTATTTGCCCAGTATGC       | TCACAAAGGATGTTGAAAGGG       | 337        |
| 10      | TTGATAGTCACTGGTGAAAGAACC   | TCCCTAATTCCTGCTTTAGAATC     | 283        |
| 11      | AAATTGAACAATATTTAATCTTCCCC | TTTGTACCTTCTAAACACAAATCAGC  | 309        |
| 12      | GTTTAGGATTTGGAAATAAAATGAT  | AGCCCTGTTCAAAGAATTGG        | 351        |
| 13      | TACAAGGACAGTGGCAGGTG       | CTCAATTCCTAGAGTACAATCACTG   | 378        |
| 14      | GCGAATGCACTTCTCTGTTG       | TGAATGCACCTATCTCCAGG        | 433        |
| 15      | CATTAGTGCTAGCATATGTCCG     | GACAACGATCTTAATGACTTTCTTAGC | 330        |
| 16      | GAGACACTTTGCCATTGATCC      | AATAGACAGAATGTCTGCAATGAC    | 509        |
| 17      | CATGTCTACTGCATATCGACTCAAC  | CAGAGGCCTGCTCTTTGG          | 442        |
| 18_1    | GGAATGAATTCAAGTTGCC        | GTGATCATCCAAACGTGCAG        | 637        |
| 18_2    | GATGATCTCATCAAACCTGAGG     | TCTGCACGGGTGTAGTTCTG        | 694        |
| 18_3    | CCGTTCAAGTCTTTGACCCAG      | AGCCTTGAGGAGACTTGACG        | 630        |
| 18_4    | CCTCCAGCAGTCTGACACAG       | GCTGGCAATCTGGGTTTG          | 629        |
| 18_5    | CTCCAATGAATCTGCCGC         | AATTGCTGGTTTTGAAATCG        | 656        |
| 18      | TGACGAGCAGGTAACAGTGG       | GTTGTGGGATGGCTCTTCAT        | 415        |
